# Supplementary material for: Isolation of amniotic stem cell lines with potential for therapy
Source: Springer Nature journal article supplement (doi:10.1038/nbt1274), 2007-01-01
Supplement: nbt1274-S1.pdf [file nbt1274-S1.pdf]

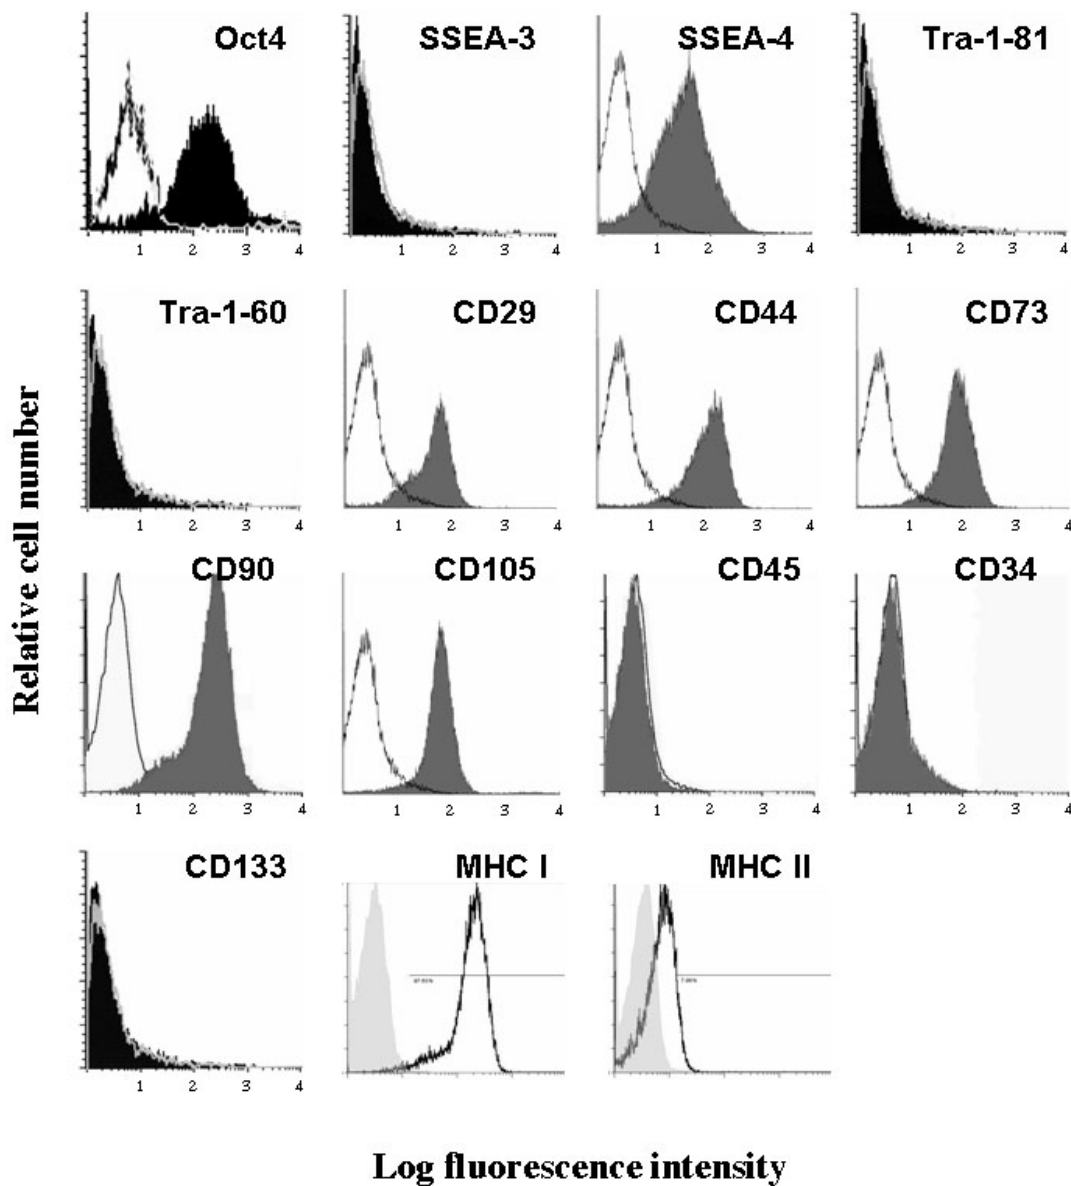

**Supplementary Fig. S1. Marker expression by human AFS cells.**

Expression of surface antigens and one intracellular protein (Oct4) was carried out by flow cytometry using mouse monoclonal antibodies (filled curve, except for MHC I and II). All panels include an isotype-matched negative control (unfilled curve, except MHC I and II).

Antigens tested were, as indicated on panels: Oct4; SSEA-3; SSEA-4; Tra-1-81; Tra-1-60; CD29; CD44; CD73; CD90; CD105; CD45; CD34; CD133; HLA-ABC (MHC I); HLA-DR (MHC II). See Supplementary Methods and Results for further details.
